# Supplementary material for: N-acetylcysteine add-on treatment leads to an improvement of fornix white matter integrity in early psychosis: a double-blind randomized placebo-controlled trial
Source: PubMed Central journal article supplement (PMC6185923; doi:10.1038/s41398-018-0266-8), 2018-10-12

# 6-month longitudinal changes n = 17

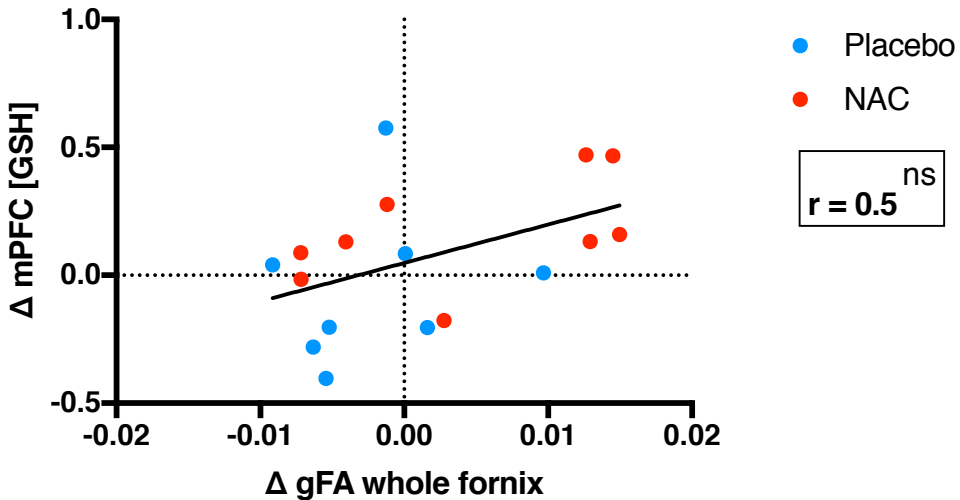

Supplement: 41398_2018_266_MOESM2_ESM.pdf [file 41398_2018_266_MOESM2_ESM.pdf]
